# Supplementary material
Source: publisher figshare collection journal article supplement (https://tandf.figshare.com/ndownloader/files/13757969)
Supplement: Supplementary file 1 [file 13757969]

**A comparative study of Ural Owl *Strix uralensis* breeding season diet within its European breeding range, derived from nest box monitoring schemes**

Al Vrezec1,2, Pertti Saurola3, Andris Avotins4, Stiven Kocijančič1, Seppo Sulkava5

1National Institute of Biology, Večna pot 111, SI-1000 Ljubljana, Slovenia, e-mail: [al.vrezec@nib.si](mailto:al.vrezec@nib.si), stiven.kocijancic@nib.si

2Slovenian Museum of Natural History, Prešernova 20, SI-1000 Ljubljana, Slovenia

3Finnish Museum of Natural History, P.O. Box 17, FI–00014 University of Helsinki, Finland, e–mail: saurola@cc.helsinki.fi

4University of Latvia, Faculty of Biology, Department of Zoology and Animal Ecology, Jelgavasiela 1, Riga, Latvia, LV-1010, e-mail: aa09285@lu.lv

5Huvilinnantie 5 A 4, FI-02600 Espoo, Finland, e-mail: seppo.sulkava@pp.inet.fi

SUPPLEMENTARY MATERIAL

**Table S1.** Prey composition in the Ural Owl diet in boreal (Finland), hemi-boreal (Latvia) and temperate region (Slovenia). Proportion of the number (N%) and biomass of prey (B%) is given per prey species with summary lines marked in bold.

| Region | Boreal | | | | Hemi-boreal | | Temperate | |
| --- | --- | --- | --- | --- | --- | --- | --- | --- |
| Country | Finland - good years | | Finland - bad years | | Latvia | | Slovenia | |
|  | N% | B% | N% | B% | N% | B% | N% | B% |
| *Sciurus vulgaris* | 0.30 | 1.65 | 0.23 | 1.08 | 0.15 | 0.93 | 0.16 | 1.47 |
| *Pteromys volans* | 0.03 | 0.08 | 0.00 | 0.00 | 0.00 | 0.00 | 0.00 | 0.00 |
| **Sciuridae, total** | **0.33** | **1.72** | **0.23** | **1.08** | **0.15** | **0.93** | **0.16** | **1.47** |
| *Dryomys nitedula* | 0.00 | 0.00 | 0.00 | 0.00 | 0.00 | 0.00 | 0.63 | 0.42 |
| *Muscardinus avellanarius* | 0.00 | 0.00 | 0.00 | 0.00 | 0.00 | 0.00 | 2.05 | 2.51 |
| *Glis glis* | 0.00 | 0.00 | 0.00 | 0.00 | 0.00 | 0.00 | 5.99 | 25.45 |
| **Gliridae, total** | **0.00** | **0.00** | **0.00** | **0.00** | **0.00** | **0.00** | **8.68** | **28.38** |
| *Sicista betulina* | 0.18 | 0.03 | 4.53 | 0.55 | 1.84 | 0.29 | 0.00 | 0.00 |
| **Dipodidae, total** | **0.18** | **0.03** | **4.53** | **0.55** | **1.84** | **0.29** | **0.00** | **0.00** |
| *Arvicola amphibius* | 10.09 | 22.24 | 9.19 | 17.03 | 3.06 | 7.44 | 0.00 | 0.00 |
| *Microtus agrestis* | 58.43 | 42.83 | 10.23 | 6.31 | 17.13 | 13.85 | 1.34 | 1.24 |
| *Microtus arvalis* | 0.06 | 0.04 | 0.00 | 0.00 | 5.74 | 3.80 | 0.87 | 0.64 |
| *Microtus subterraneus* | 0.00 | 0.00 | 0.00 | 0.00 | 1.15 | 0.45 | 3.55 | 1.81 |
| *Microtus oeconomus* | 0.00 | 0.00 | 0.00 | 0.00 | 0.31 | 0.21 | 0.00 | 0.00 |
| *Myodes glareolus* | 12.41 | 5.73 | 15.35 | 5.95 | 18.09 | 9.20 | 38.17 | 26.24 |
| *Myopus schisticolor* | 1.25 | 0.64 | 0.35 | 0.15 | 0.00 | 0.00 | 0.00 | 0.00 |
| Arvicolinae unident. | 1.82 | 0.52 | 1.98 | 0.48 | 6.46 | 3.64 | 2.05 | 1.49 |
| **Cricetidae, total** | **84.06** | **72.01** | **37.09** | **29.92** | **51.93** | **38.60** | **45.98** | **31.42** |
| *Apodemus* sp. | 0.36 | 0.22 | 1.05 | 0.53 | 2.14 | 1.42 | 34.23 | 28.19 |
| *Micromys minutus* | 0.15 | 0.03 | 0.81 | 0.13 | 0.04 | 0.01 | 0.00 | 0.00 |
| *Mus musculus* | 0.00 | 0.00 | 0.00 | 0.00 | 0.00 | 0.00 | 0.00 | 0.00 |
| *Rattus norvegicus* ad. | 1.01 | 6.22 | 0.93 | 4.79 | 0.04 | 0.26 | 0.00 | 0.00 |
| *Rattus norvegicus* juv. | 0.48 | 1.46 | 0.12 | 0.30 | 0.00 | 0.00 | 0.00 | 0.00 |
| **Muridae, total** | **2.00** | **7.92** | **2.91** | **5.75** | **2.22** | **1.69** | **34.23** | **28.19** |
| *Lepus* sp. | 0.00 | 0.00 | 0.00 | 0.00 | 0.04 | 2.41 | 0.00 | 0.00 |
| Lepus sp. juv. | 0.57 | 5.79 | 1.86 | 15.97 | 0.00 | 0.00 | 0.00 | 0.00 |
| **Leporidae, total** | **0.57** | **5.79** | **1.86** | **15.97** | **0.04** | **2.41** | **0.00** | **0.00** |
| *Neomys fodiens* | 0.18 | 0.05 | 0.58 | 0.13 | 1.34 | 0.39 | 0.00 | 0.00 |
| *Sorex alpinus* | 0.00 | 0.00 | 0.00 | 0.00 | 0.00 | 0.00 | 0.16 | 0.04 |
| *Sorex araneus* | 3.16 | 0.59 | 11.40 | 1.78 | 8.07 | 1.65 | 1.03 | 0.28 |
| *Sorex caecutiens* | 0.09 | 0.01 | 1.05 | 0.11 | 0.00 | 0.00 | 0.00 | 0.00 |
| *Sorex minutus* | 0.03 | 0.00 | 0.35 | 0.02 | 0.61 | 0.05 | 0.00 | 0.00 |
| **Soricidae, total** | **3.46** | **0.65** | **13.37** | **2.04** | **10.02** | **2.10** | **1.18** | **0.32** |
| *Talpa europaea* | 1.10 | 1.25 | 1.63 | 1.55 | 9.83 | 12.30 | 4.42 | 8.25 |
| **Talpidae, total** | **1.10** | **1.25** | **1.63** | **1.55** | **9.83** | **12.30** | **4.42** | **8.25** |
| **Chiroptera** | **0.03** | **0.01** | **0.00** | **0.00** | **0.00** | **0.00** | **0.00** | **0.00** |
| *Mustela nivalis* | 0.57 | 0.48 | 0.00 | 0.00 | 0.00 | 0.00 | 0.00 | 0.00 |
| *Mustela erminea* | 0.00 | 0.00 | 0.00 | 0.00 | 0.08 | 0.17 | 0.00 | 0.00 |
| **Mustelidae, total** | **0.57** | **0.48** | **0.00** | **0.00** | **0.08** | **0.17** | **0.00** | **0.00** |
| **Mamalia, total** | **92.30** | **89.86** | **61.63** | **56.87** | **76.10** | **58.49** | **94.64** | **98.03** |
| Anatidae juv. | 0.09 | 0.05 | 0.12 | 0.05 | 0.00 | 0.00 | 0.00 | 0.00 |
| **Anatidae, total** | **0.09** | **0.05** | **0.12** | **0.05** | **0.00** | **0.00** | **0.00** | **0.00** |
| *Tetrastes bonasia* | 0.18 | 1.28 | 0.70 | 4.19 | 0.00 | 0.00 | 0.00 | 0.00 |
| Galliformes juv. | 0.39 | 0.40 | 0.81 | 0.70 | 0.00 | 0.00 | 0.00 | 0.00 |
| **Phasianidae, total** | **0.57** | **1.68** | **1.51** | **4.89** | **0.00** | **0.00** | **0.00** | **0.00** |
| *Accipiter nisus* | 0.00 | 0.00 | 0.12 | 0.40 | 0.00 | 0.00 | 0.00 | 0.00 |
| **Accipitridae, total** | **0.00** | **0.00** | **0.12** | **0.40** | **0.00** | **0.00** | **0.00** | **0.00** |
| *Scolopax rusticola* | 0.15 | 0.91 | 0.70 | 3.59 | 0.00 | 0.00 | 0.00 | 0.00 |
| *Gallinago gallinago* | 0.03 | 0.06 | 0.00 | 0.00 | 0.00 | 0.00 | 0.00 | 0.00 |
| **Scolopacidae, total** | **0.18** | **0.97** | **0.70** | **3.59** | **0.00** | **0.00** | **0.00** | **0.00** |
| *Columba palumbus* | 0.06 | 0.61 | 0.00 | 0.00 | 0.00 | 0.00 | 0.00 | 0.00 |
| **Columbidae, total** | **0.06** | **0.61** | **0.00** | **0.00** | **0.00** | **0.00** | **0.00** | **0.00** |
| *Asio otus* | 0.03 | 0.12 | 0.00 | 0.00 | 0.00 | 0.00 | 0.00 | 0.00 |
| **Strigidae, total** | **0.03** | **0.12** | **0.00** | **0.00** | **0.00** | **0.00** | **0.00** | **0.00** |
| *Dendrocopos major* | 0.12 | 0.21 | 0.00 | 0.00 | 0.00 | 0.00 | 0.00 | 0.00 |
| *Dryocopus martius* | 0.03 | 0.20 | 0.35 | 1.98 | 0.00 | 0.00 | 0.00 | 0.00 |
| **Picidae, total** | **0.15** | **0.42** | **0.35** | **1.98** | **0.00** | **0.00** | **0.00** | **0.00** |
| *Garullus glandarius* | 0.00 | 0.00 | 0.47 | 1.29 | 0.00 | 0.00 | 0.00 | 0.00 |
| *Corvus cornix* | 0.00 | 0.00 | 0.12 | 1.05 | 0.00 | 0.00 | 0.00 | 0.00 |
| *Pica pica* | 0.00 | 0.00 | 0.12 | 0.47 | 0.00 | 0.00 | 0.00 | 0.00 |
| **Corvidae, total** | **0.00** | **0.00** | **0.70** | **2.80** | **0.00** | **0.00** | **0.00** | **0.00** |
| *Parus major* size | 0.06 | 0.02 | 1.63 | 0.52 | 0.00 | 0.00 | 0.00 | 0.00 |
| **Paridae, total** | **0.06** | **0.02** | **1.63** | **0.52** | **0.00** | **0.00** | **0.00** | **0.00** |
| *Phylloscopus* size | 0.18 | 0.03 | 0.93 | 0.14 | 0.00 | 0.00 | 0.00 | 0.00 |
| **Phylloscopidae, total** | **0.18** | **0.03** | **0.93** | **0.14** | **0.00** | **0.00** | **0.00** | **0.00** |
| *Turdus philomelos* | 0.00 | 0.00 | 0.12 | 0.14 | 0.00 | 0.00 | 0.08 | 0.15 |
| *Turdus pilaris* | 0.00 | 0.00 | 0.23 | 0.42 | 0.00 | 0.00 | 0.00 | 0.00 |
| *Turdus merula* | 0.00 | 0.00 | 0.12 | 0.20 | 0.00 | 0.00 | 0.00 | 0.00 |
| *Turdus* sp. | 1.91 | 3.63 | 8.95 | 14.29 | 5.62 | 11.77 | 0.08 | 0.19 |
| *Turdus* sp. juv. | 0.09 | 0.09 | 10.00 | 8.58 | 0.00 | 0.00 | 0.00 | 0.00 |
| **Turdidae, total** | **2.00** | **3.72** | **19.42** | **23.64** | **5.62** | **11.77** | **0.16** | **0.34** |
| *Fringilla coelebs* | 0.51 | 0.23 | 3.84 | 1.45 | 0.00 | 0.00 | 1.50 | 0.97 |
| *Pyrrhula pyrrhula* | 0.03 | 0.02 | 0.12 | 0.06 | 0.00 | 0.00 | 0.00 | 0.00 |
| **Fringillidae, total** | **0.54** | **0.24** | **3.95** | **1.50** | **0.00** | **0.00** | **1.50** | **0.97** |
| Aves unidet. Small | 0.18 | 0.05 | 2.79 | 0.72 | 5.43 | 1.83 | 0.63 | 0.27 |
| Aves unidet. Large | 0.00 | 0.00 | 0.00 | 0.00 | 3.56 | 24.02 | 0.00 | 0.00 |
| **Aves, total** | **4.03** | **7.91** | **32.21** | **40.25** | **14.61** | **37.63** | **2.29** | **1.59** |
| *Rana* sp. | 3.64 | 2.23 | 5.58 | 2.87 | 5.74 | 3.87 | 0.55 | 0.36 |
| **Ranidae, total** | **3.64** | **2.23** | **5.58** | **2.87** | **5.74** | **3.87** | **0.55** | **0.36** |
| **Amphibia, total** | **3.64** | **2.23** | **5.58** | **2.87** | **5.74** | **3.87** | **0.55** | **0.36** |
| *Carabus* sp. | 0.00 | 0.00 | 0.12 | 0.00 | 0.00 | 0.00 | 0.00 | 0.00 |
| *Molops striolatus* | 0.00 | 0.00 | 0.00 | 0.00 | 0.00 | 0.00 | 0.32 | 0.00 |
| *Abax* sp. | 0.00 | 0.00 | 0.00 | 0.00 | 0.00 | 0.00 | 0.08 | 0.00 |
| Carabidae, unident. | 0.00 | 0.00 | 0.00 | 0.00 | 0.00 | 0.00 | 0.79 | 0.01 |
| Curculionoidea | 0.00 | 0.00 | 0.00 | 0.00 | 0.00 | 0.00 | 0.32 | 0.00 |
| Geotrupidae | 0.03 | 0.00 | 0.35 | 0.00 | 0.00 | 0.00 | 0.16 | 0.00 |
| Scarabaeoidea, unident. | 0.00 | 0.00 | 0.00 | 0.00 | 0.00 | 0.00 | 0.16 | 0.00 |
| Coleoptera, unident. | 0.00 | 0.00 | 0.00 | 0.00 | 0.00 | 0.00 | 0.63 | 0.00 |
| **Coleoptera, total** | **0.03** | **0.00** | **0.47** | **0.00** | **0.00** | **0.00** | **2.44** | **0.01** |
| *Bombus* sp. | 0.00 | 0.00 | 0.12 | 0.00 | 0.00 | 0.00 | 0.00 | 0.00 |
| **Hymenoptera, total** | **0.00** | **0.00** | **0.12** | **0.00** | **0.00** | **0.00** | **0.00** | **0.00** |
| **Insecta, total** | **0.03** | **0.00** | **0.58** | **0.00** | **3.56** | **0.01** | **2.44** | **0.01** |
| **Lumbricidae** | **0.00** | **0.00** | **0.00** | **0.00** | **0.00** | **0.00** | **0.08** | **0.00** |
| No. prey items / Total biomass [g] | 3351 | 164102g | 860 | 50096g | 2615 | 116144g | 1268 | 43721g |

**Table S2.** Significance of Ural Owl diet variables not included in the discrimination model after backward-stepwise procedure.

| Diet explanatory variable | Partial Wilks' Lambda | F | *P* |
| --- | --- | --- | --- |
| Forest prey | 0.80 | 7.39 | <0.001 |
| Muridae | 0.83 | 5.89 | 0.001 |
| Predators | 0.87 | 4.31 | <0.01 |
| Arboreal prey | 0.92 | 2.42 | 0.07 |
| Flying prey | 0.79 | 7.96 | <0.001 |
| Diversity | 0.83 | 5.95 | <0.001 |
| Leporidae | 0.80 | 7.52 | <0.001 |
| Cricetidae | 0.78 | 8.42 | <0.001 |
| Soricidae | 0.76 | 9.17 | <0.001 |

**Table S3.** Diet variables used for assessment of the relationship between breeding performance and diet of the Ural Owl.

| Abbreviation | Variable | Mean (MIN - MAX) |
| --- | --- | --- |
| Chicks | Brood size | 2.67 (1 - 6) |
| ApW | Average prey weight | 43.83 (17.18 - 123.36) |
| CricB | Cricetidae (biomass %) | 40.54 (0.46 - 97.45) |
| MuriB | Muridae (biomass %) | 7.38 (0 - 82.03) |
| SoriB | Soricidae (biomass %) | 1.44 (0 - 11.06) |
| TalpB | Talpidae (biomass %) | 10.62 (0 - 43.01) |
| nonMB | non-Mamalia (biomass %) | 31.3 (0 - 89.63) |
| LargN | Large prey (abundance %) | 12.54 (0 - 78.57) |
| Div | Simpson`s diversity index | 0.21 (0.03 - 0.73) |
| PredN | Predators (abundance %) | 0.16 (0 - 2.49) |
| ForeN | Forest prey (abundance %) | 11.53 (0 - 92.86) |

**Table S4.** Set of competitive Generalized Linear Models used for evaluation of the relationship between brood size and diet of the Ural Owl across its range in Europe.

| Models | AICc | ΔAIC | weight | R2 | Adjusted R2 |
| --- | --- | --- | --- | --- | --- |
| Brood size ~ ApW + CricB + MuriB + 1 | 302.49 | 0.00 | 0.126 | 0.22 | 0.23 |
| Brood size ~ ApW + CricB + nonMB + 1 | 302.61 | 0.13 | 0.118 | 0.22 | 0.23 |
| Brood size ~ ApW + CricB + MuriB + TalpB + 1 | 303.07 | 0.58 | 0.094 | 0.23 | 0.24 |
| Brood size ~ ApW + CricB + MuriB + PredN + 1 | 303.33 | 0.84 | 0.083 | 0.23 | 0.24 |
| Brood size ~ ApW + CricB + nonMB + PredN + 1 | 303.65 | 1.16 | 0.070 | 0.23 | 0.24 |
| Brood size ~ CricB + LargN + MuriB + 1 | 303.82 | 1.34 | 0.064 | 0.21 | 0.22 |
| Brood size ~ ApW + CricB + MuriB + PredN + TalpB + 1 | 303.99 | 1.50 | 0.059 | 0.25 | 0.25 |
| Brood size ~ CricB + nonMB + 1 | 304.00 | 1.51 | 0.059 | 0.19 | 0.20 |
| Brood size ~ CricB + LargN + nonMB + 1 | 304.02 | 1.53 | 0.059 | 0.21 | 0.22 |
| Brood size ~ CricB + LargN + MuriB + PredN + 1 | 304.06 | 1.57 | 0.057 | 0.23 | 0.23 |
| Brood size ~ CricB + nonMB + PredN + 1 | 304.12 | 1.64 | 0.056 | 0.21 | 0.21 |
| Brood size ~ ApW + ForeN + nonMB + 1 | 304.21 | 1.72 | 0.053 | 0.21 | 0.21 |
| Brood size ~ Div + ForeN + LargN + MuriB + 1 | 304.27 | 1.78 | 0.052 | 0.22 | 0.23 |
| Brood size ~ ApW + CricB + nonMB + SoriB + 1 | 304.39 | 1.90 | 0.049 | 0.22 | 0.23 |
| Brood size ~ 1 (null model) | 319.59 | 17.10 | <0.001 | 0.00 | 0.00 |


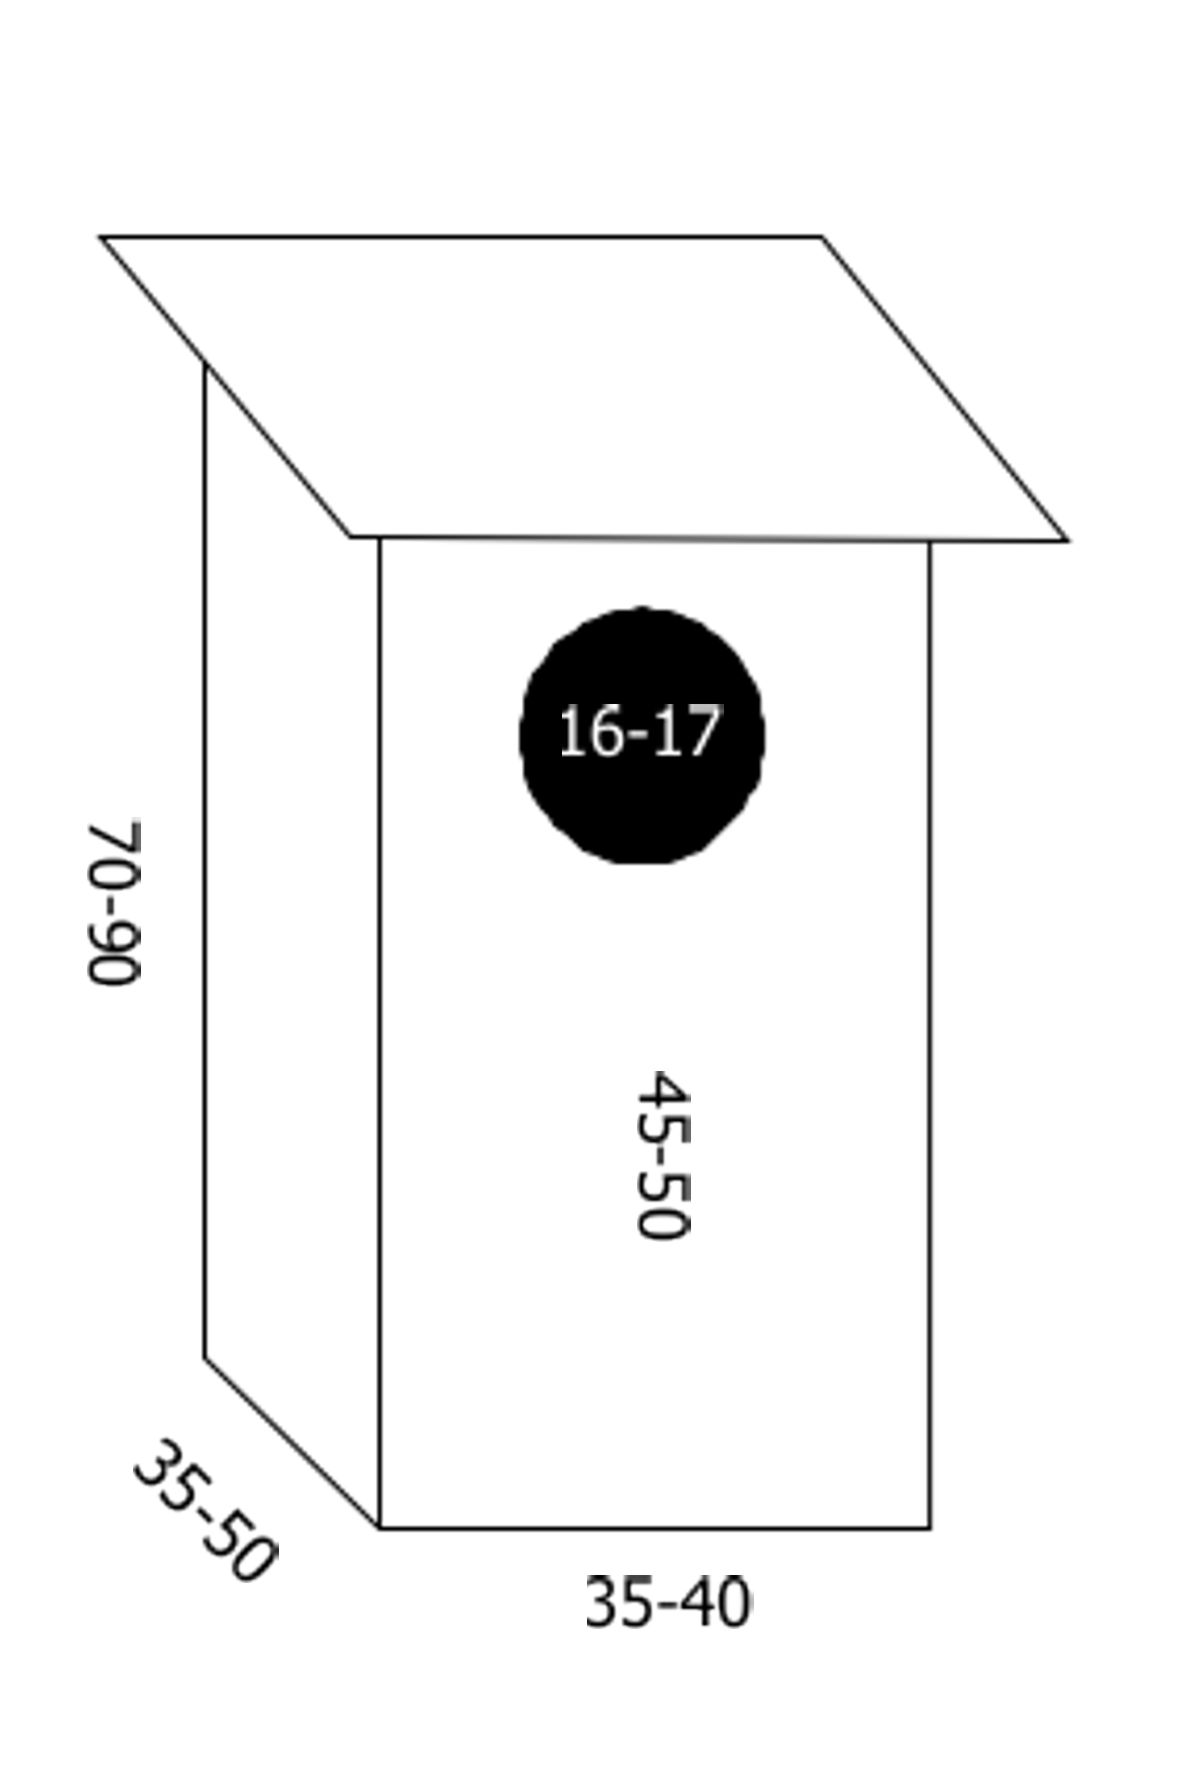
A
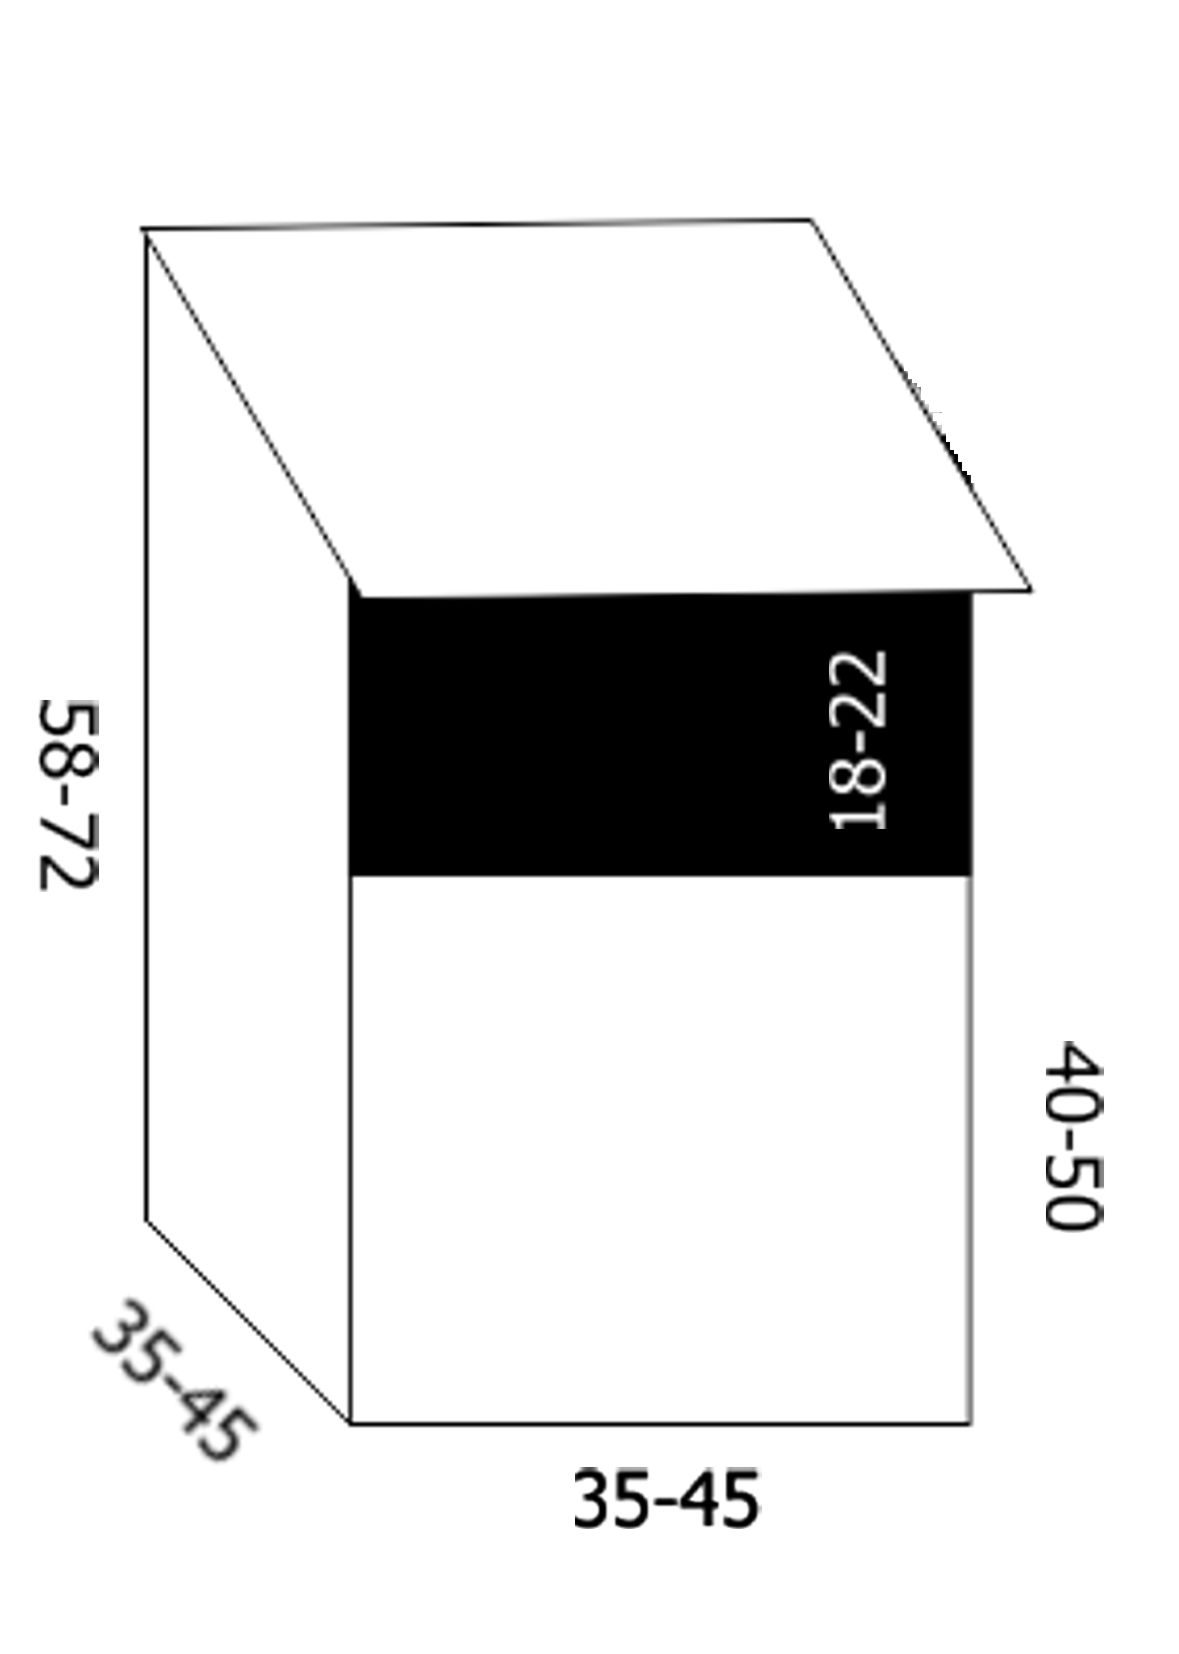
B
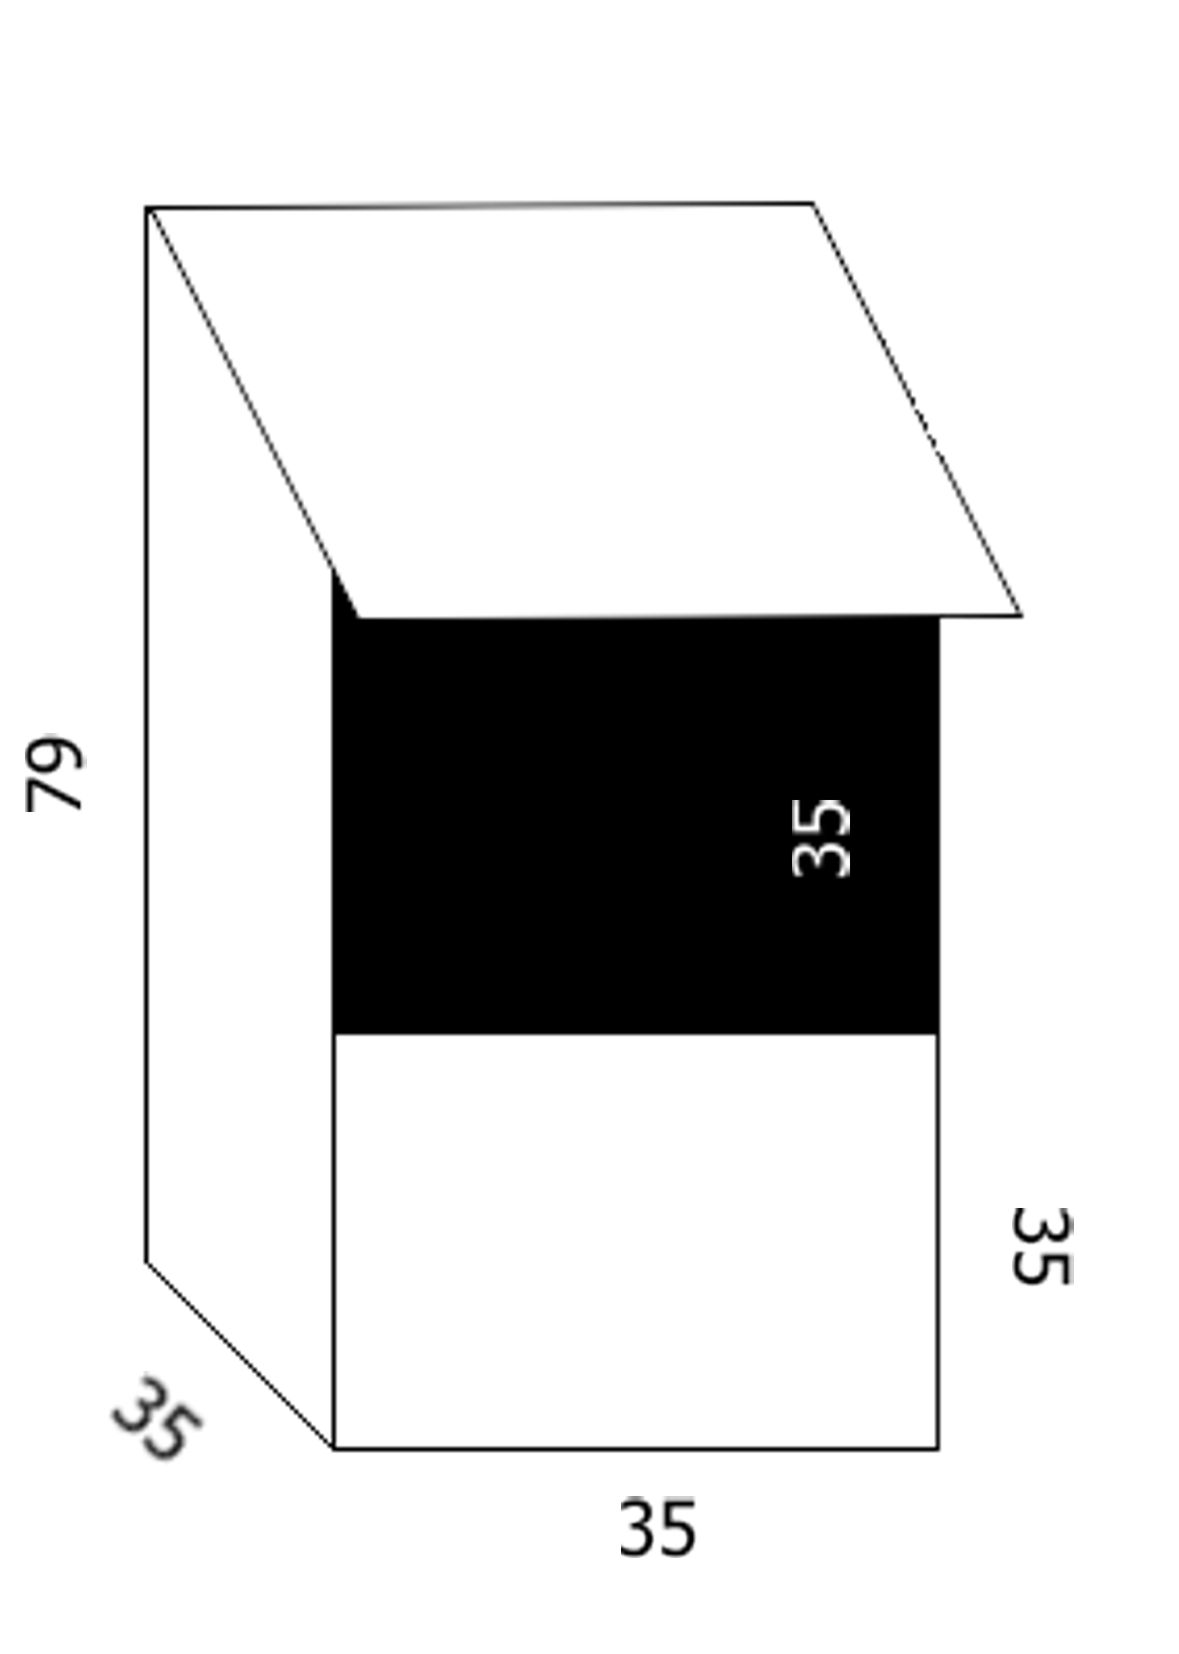
C

**Figure S1.** Nest box designs for the Ural Owl *Strix uralensis* used in Finland (A), Latvia (B) and Slovenia (C) during the study period (measurements are in centimetres).
